# Supplementary material for: Synthesis and characterization of transparent polyimides derived from ester-containing dianhydrides with different electron affinities
Source: Royal Society of Chemistry journal article supplement (doi:10.1039/c5ra16574a), 2015-01-01
Supplement: c5ra16574a1.pdf [file c5ra16574a1.pdf]

## Electronic Supplementary Information

### Synthesis and characterization of transparent polyimides derived from ester-containing dianhydrides with different electron affinities

Yu Zhou<sup>a,b</sup>, Guofei Chen<sup>a\*</sup>, Wei Wang<sup>a</sup>, Lihong Wei<sup>a</sup>, Qiuju Zhang<sup>a</sup>, Liping Song<sup>b</sup>,  
Xingzhong Fang<sup>a\*</sup>

**Fig. S1** FT-IR spectrum of 4-hydroxyphthalonitrile.

**Fig. S2** FT-IR spectrum of 4-hydroxyphthalic acid.

**Fig. S3** FT-IR spectrum of 4-hydroxyphthalic anhydride.

**Fig. S4** COSY spectrum of **PI-1b-C** in DMSO-*d*<sub>6</sub>.

**Fig. S5** COSY spectrum of **PI-2b-C** in DMSO-*d*<sub>6</sub>.

**Fig. S6** COSY spectrum of **PI-3b-C** in DMSO-*d*<sub>6</sub>.

**Fig. S7** UV-vis spectra of polyimide films in terms of transmittance.

**Fig. S8** Plots of absorption coefficient ( $\alpha$ ) vs. wavelength.

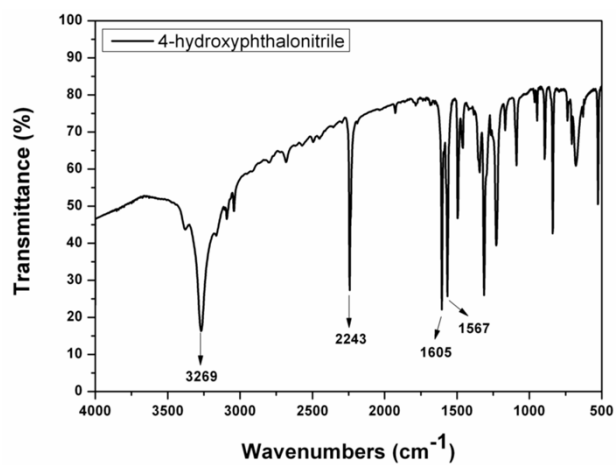

Fig. S1 FT-IR spectrum of 4-hydroxyphthalonitrile.

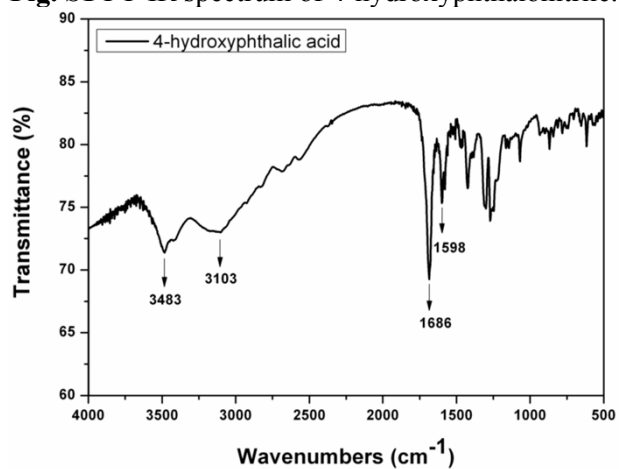

Fig. S2 FT-IR spectrum of 4-hydroxyphthalic acid.

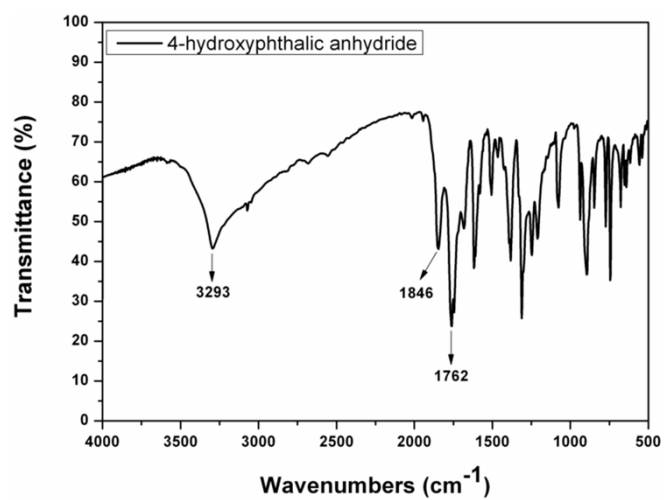

Fig. S3 FT-IR spectrum of 4-hydroxyphthalic anhydride.

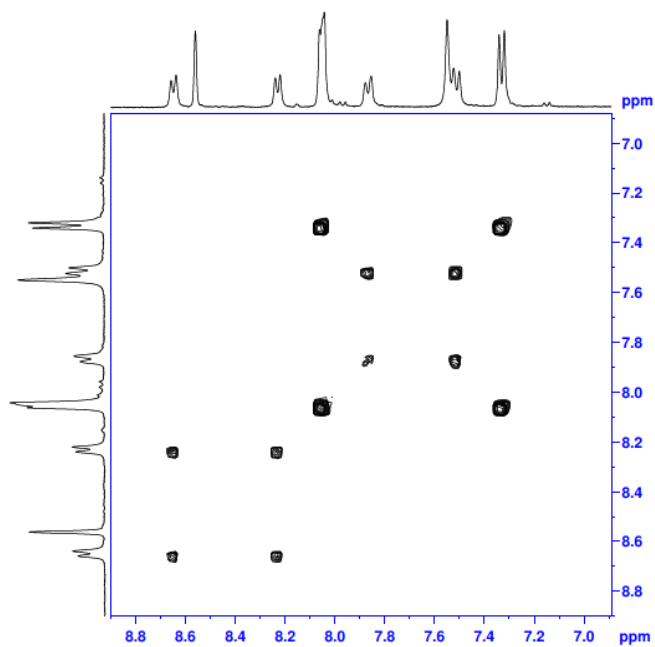

**Fig. S4** COSY spectrum of **PI-1b-C** in  $\text{DMSO-}d_6$ .

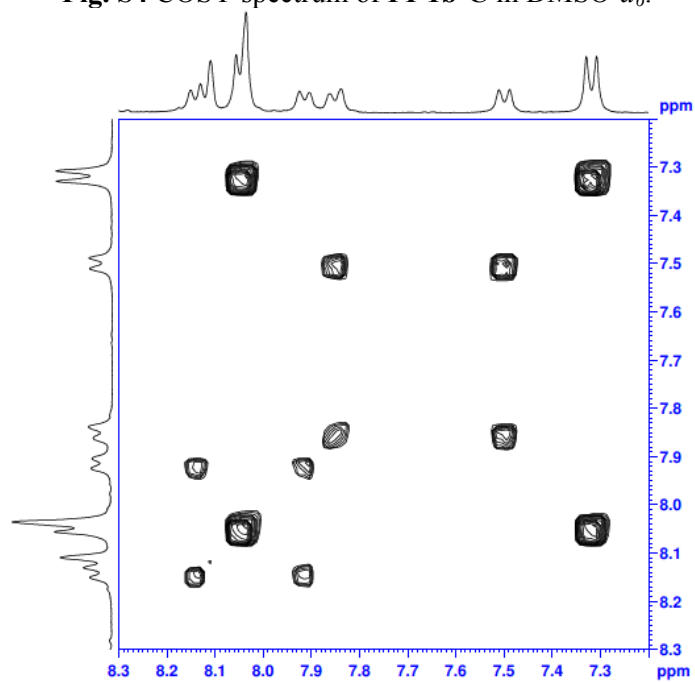

**Fig. S5** COSY spectrum of **PI-2b-C** in  $\text{DMSO-}d_6$ .

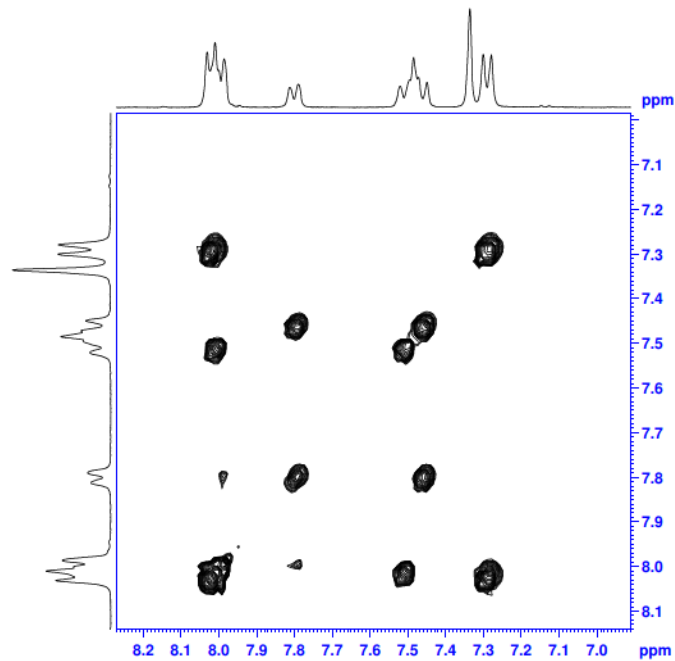

Fig. S6 COSY spectrum of PI-3b-C in DMSO- $d_6$ .

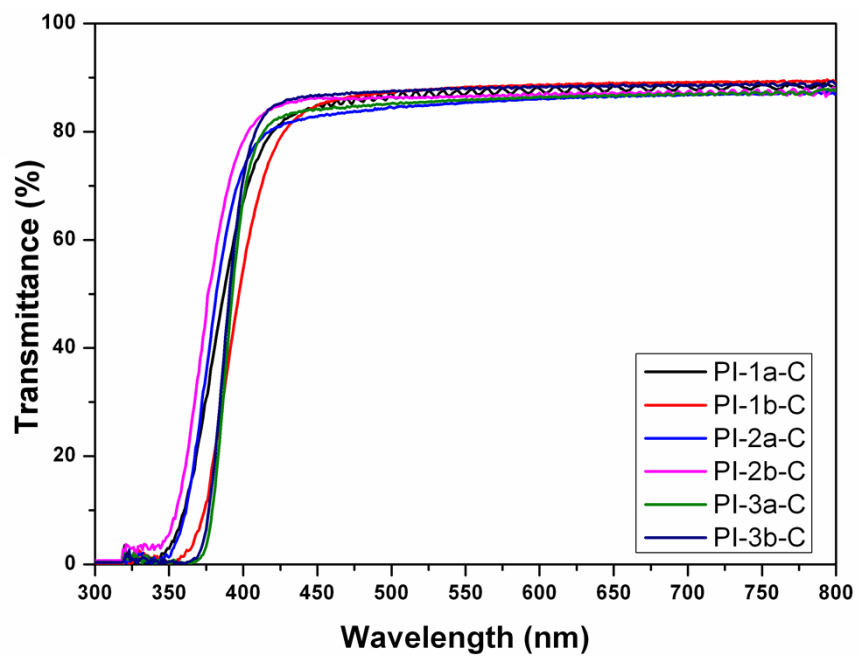

Fig. S7 UV-vis spectra of polyimide films in terms of transmittance.

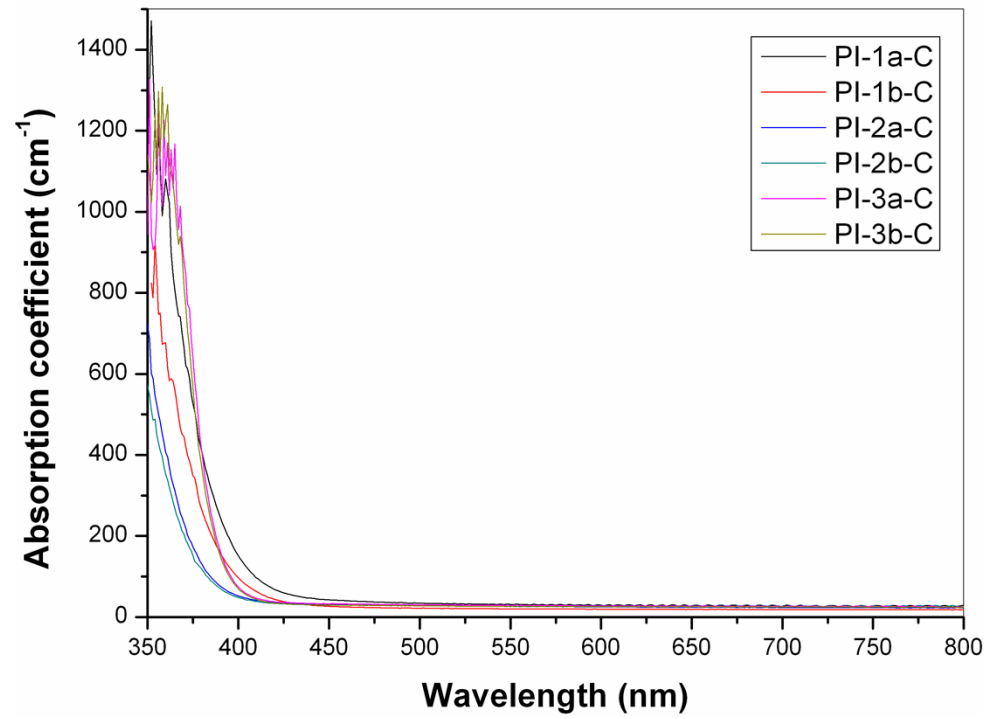

**Fig. S8** Plots of absorption coefficient ( $\alpha$ ) vs. wavelength.
